# Supplementary material for: Amine post-functionalized POSS-based porous polymers exhibiting simultaneously enhanced porosity and carbon dioxide adsorption properties
Source: Royal Society of Chemistry journal article supplement (doi:10.1039/c5ra26617c), 2016-01-01
Supplement: c5ra26617c1.pdf [file c5ra26617c1.pdf]

## **Electronic Supplementary Information**

### **Amine post-functionalized POSS-based porous polymers exhibiting simultaneously enhanced porosity and carbon dioxide adsorption properties**

Dengxu Wang,<sup>a,b\*</sup> Wenyan Yang,<sup>b</sup> Shengyu Feng,<sup>a,b\*</sup> Hongzhi Liu<sup>b\*</sup>

<sup>a</sup> *National Engineering Technology Research Center for Colloidal Materials,  
Shandong University;* <sup>b</sup> *Key Laboratory of Special Functional Aggregated Materials  
& Key Laboratory of Colloid and Interface Chemistry (Shandong University),  
Ministry of Education, School of Chemistry and Chemical Engineering, Shandong  
University, Jinan 250100, P. R. China*

\*Corresponding Authors. Tel: +86 531 88364866. Fax: +86 531 88564464. E-mail:

[dxwang@sdu.edu.cn](mailto:dxwang@sdu.edu.cn); [fsy@sdu.edu.cn](mailto:fsy@sdu.edu.cn); [liuhongzhi@sdu.edu.cn](mailto:liuhongzhi@sdu.edu.cn).

## Table of contents

**Fig. S1** (a) The FT-IR spectra of HPP-1, HPP-1-EDA at 24 h and 72 h; (b) the FT-IR spectra were enlarged from  $2000\text{ cm}^{-1}$  to  $800\text{ cm}^{-1}$

**Fig. S2** (a) The FT-IR spectra of HPP-1, HPP-1-HDA at 24 h and 72 h; (b) the FT-IR spectra were enlarged from  $2000\text{ cm}^{-1}$  to  $800\text{ cm}^{-1}$

**Fig. S3** TGA curves of HPP-1, HPP-1-EDA and HPP-1-HDA under  $\text{N}_2$  at  $10\text{ }^\circ\text{C min}^{-1}$  from  $30^\circ\text{C}$  to  $800^\circ\text{C}$

**Fig. S4** XRD patterns of HPP-1, HPP-1-EDA and HPP-1-HDA

**Fig. S5** FE-SEM images of HPP-1-EDA (left) and HPP-1-HDA (right)

**Fig. S6** HR-TEM images of HPP-1-EDA (left) and HPP-1-HDA (right)

**Fig. S7** BET plots of HPP-1 (top,  $r = 0.999970$ ,  $C = 111.91$ ), HPP-1-EDA (middle,  $r = 0.999910$ ,  $C = 166.16$ ) and HPP-1-HDA (bottom,  $r = 0.999992$ ,  $C = 190.22$ )

**Fig. S8**  $\text{CO}_2$  adsorption (closed symbols) and desorption (open symbols) isotherms of HPP-1-EDA and HPP-1-HDA at  $273\text{ K}$  and  $298\text{ K}$

**Fig. S9** Ten cycles of  $\text{CO}_2$  uptakes of HPP-1-EDA (a) and HPP-1-HDA (b) at  $273\text{ K}$ . After saturation, the sample was regenerated with a temperature swing to  $80^\circ\text{C}$  and then under vacuum.

**Fig. S10** Toth model fitting of  $\text{CO}_2$  (a) and  $\text{N}_2$  (b) adsorption isotherms of HPP-1 at  $298\text{ K}$

**Fig. S11** Toth model fitting of  $\text{CO}_2$  (a) and  $\text{N}_2$  (b) adsorption isotherms of HPP-1-EDA at  $298\text{ K}$

**Fig. S12** Toth model fitting of  $\text{CO}_2$  (a) and  $\text{N}_2$  (b) adsorption isotherms of HPP-1-HDA at  $298\text{ K}$

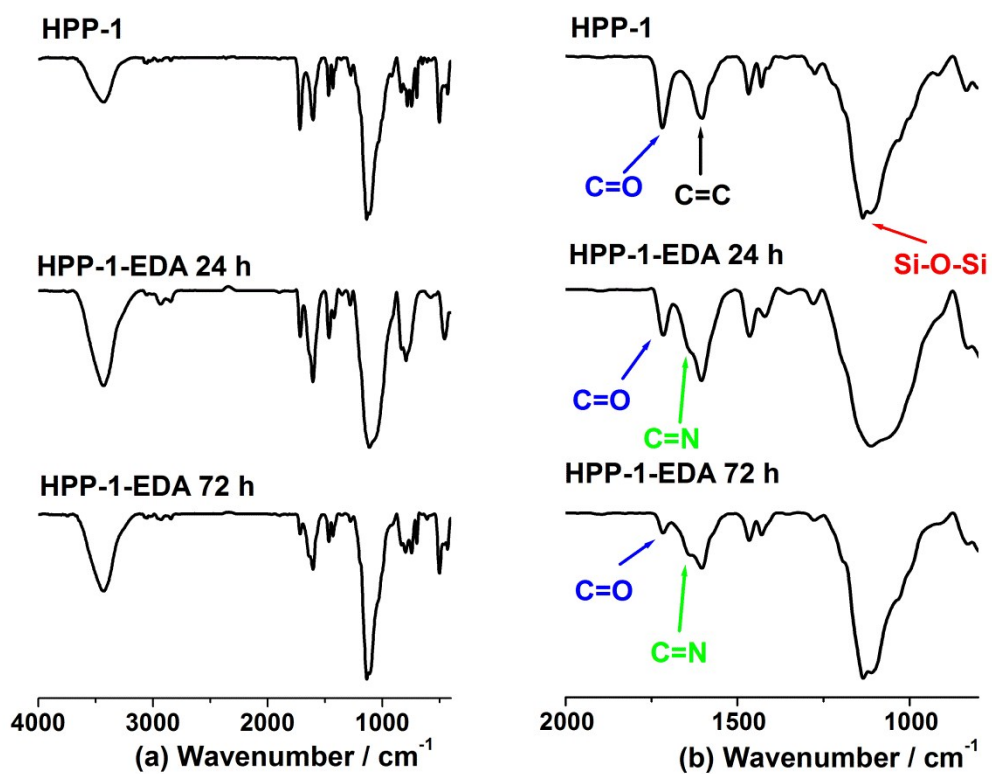

**Fig. S1.** (a) The FT-IR spectra of HPP-1, HPP-1-EDA at 24 h and 72 h; (b) the FT-IR spectra were enlarged from 2000  $\text{cm}^{-1}$  to 800  $\text{cm}^{-1}$

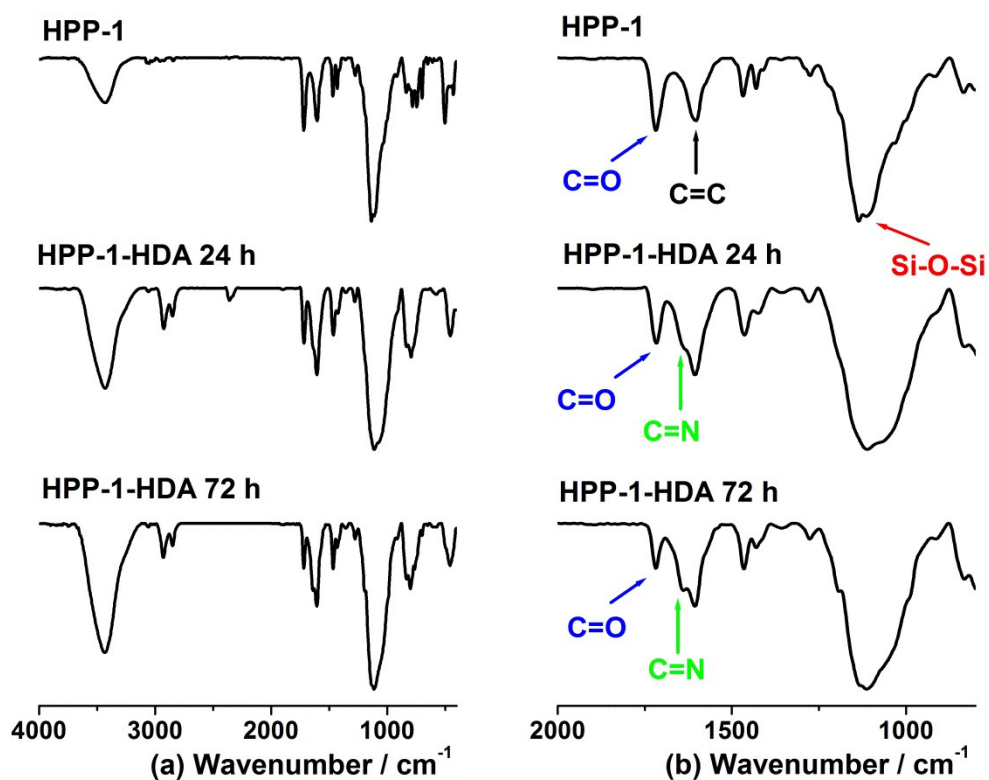

**Fig. S2.** (a) The FT-IR spectra of HPP-1, HPP-1-HDA at 24 h and 72 h; (b) the FT-IR spectra were enlarged from 2000  $\text{cm}^{-1}$  to 800  $\text{cm}^{-1}$

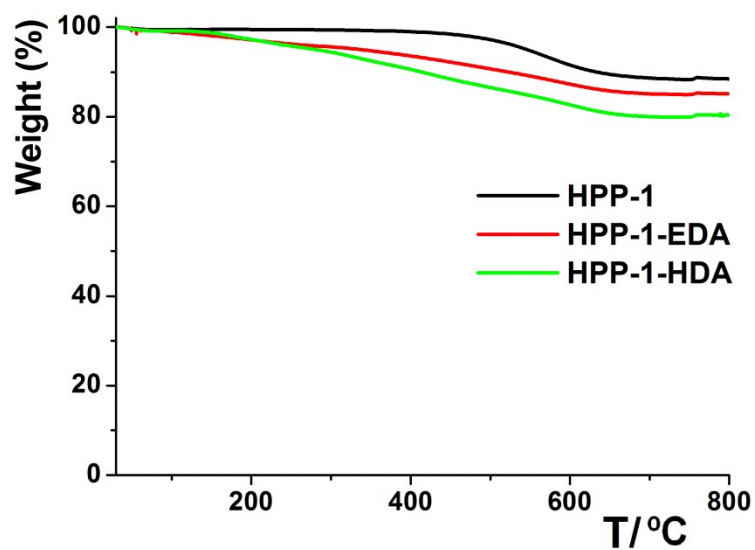

**Fig. S3.** TGA curves of HPP-1, HPP-1-EDA and HPP-1-HDA under  $N_2$  at  $10\text{ }^\circ\text{C min}^{-1}$  from  $30\text{ }^\circ\text{C}$  to  $800\text{ }^\circ\text{C}$

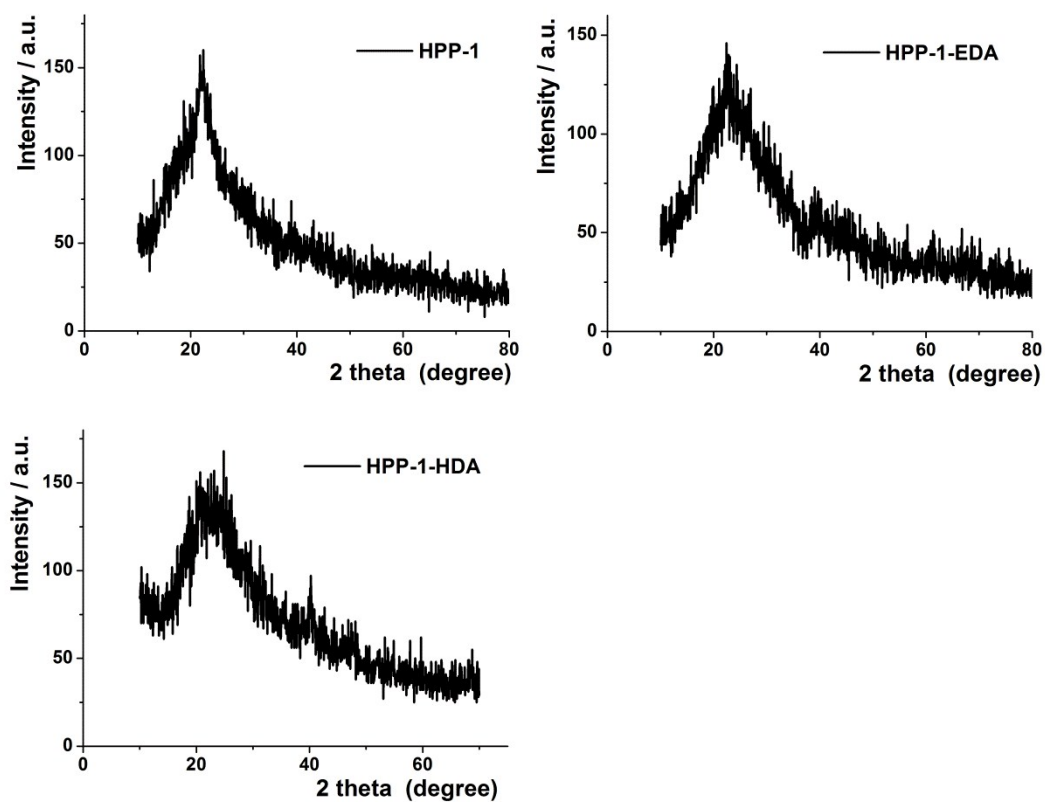

**Fig. S4** XRD patterns of HPP-1, HPP-1-EDA and HPP-1-HDA

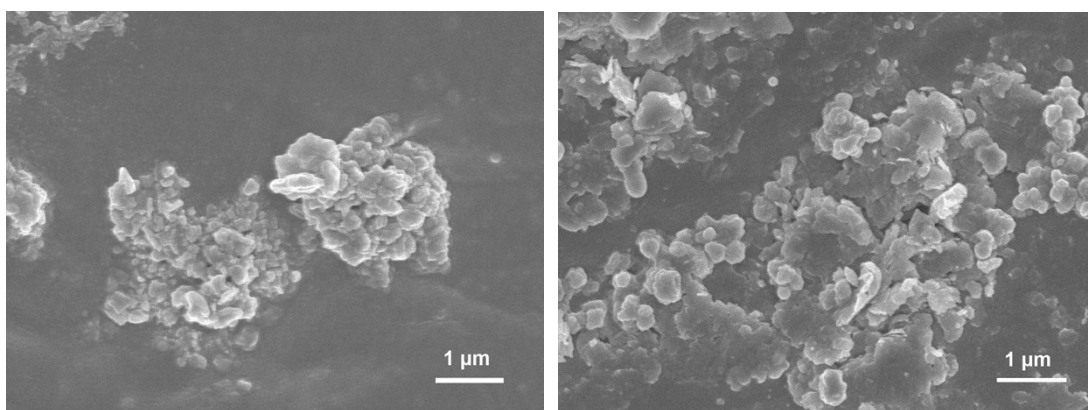

**Fig. S5** FE-SEM images of HPP-1-EDA (left) and HPP-1-HDA (right)

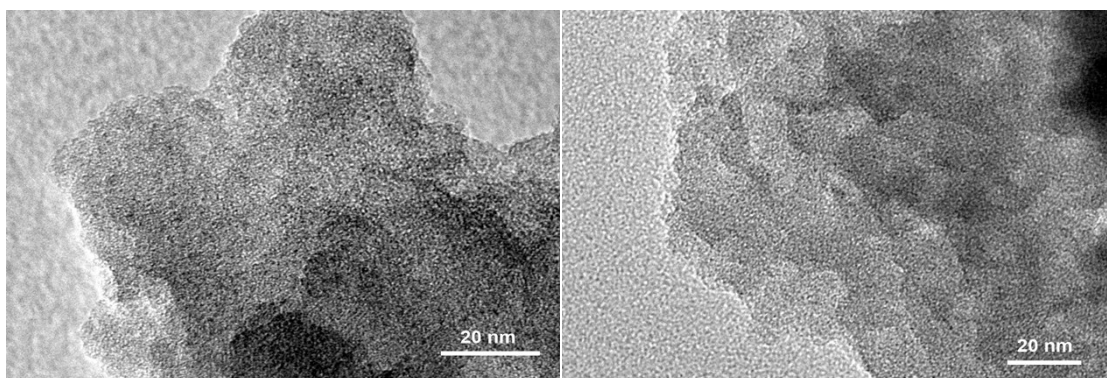

**Fig. S6** HR-TEM images of HPP-1-EDA (left) and HPP-1-HDA (right)

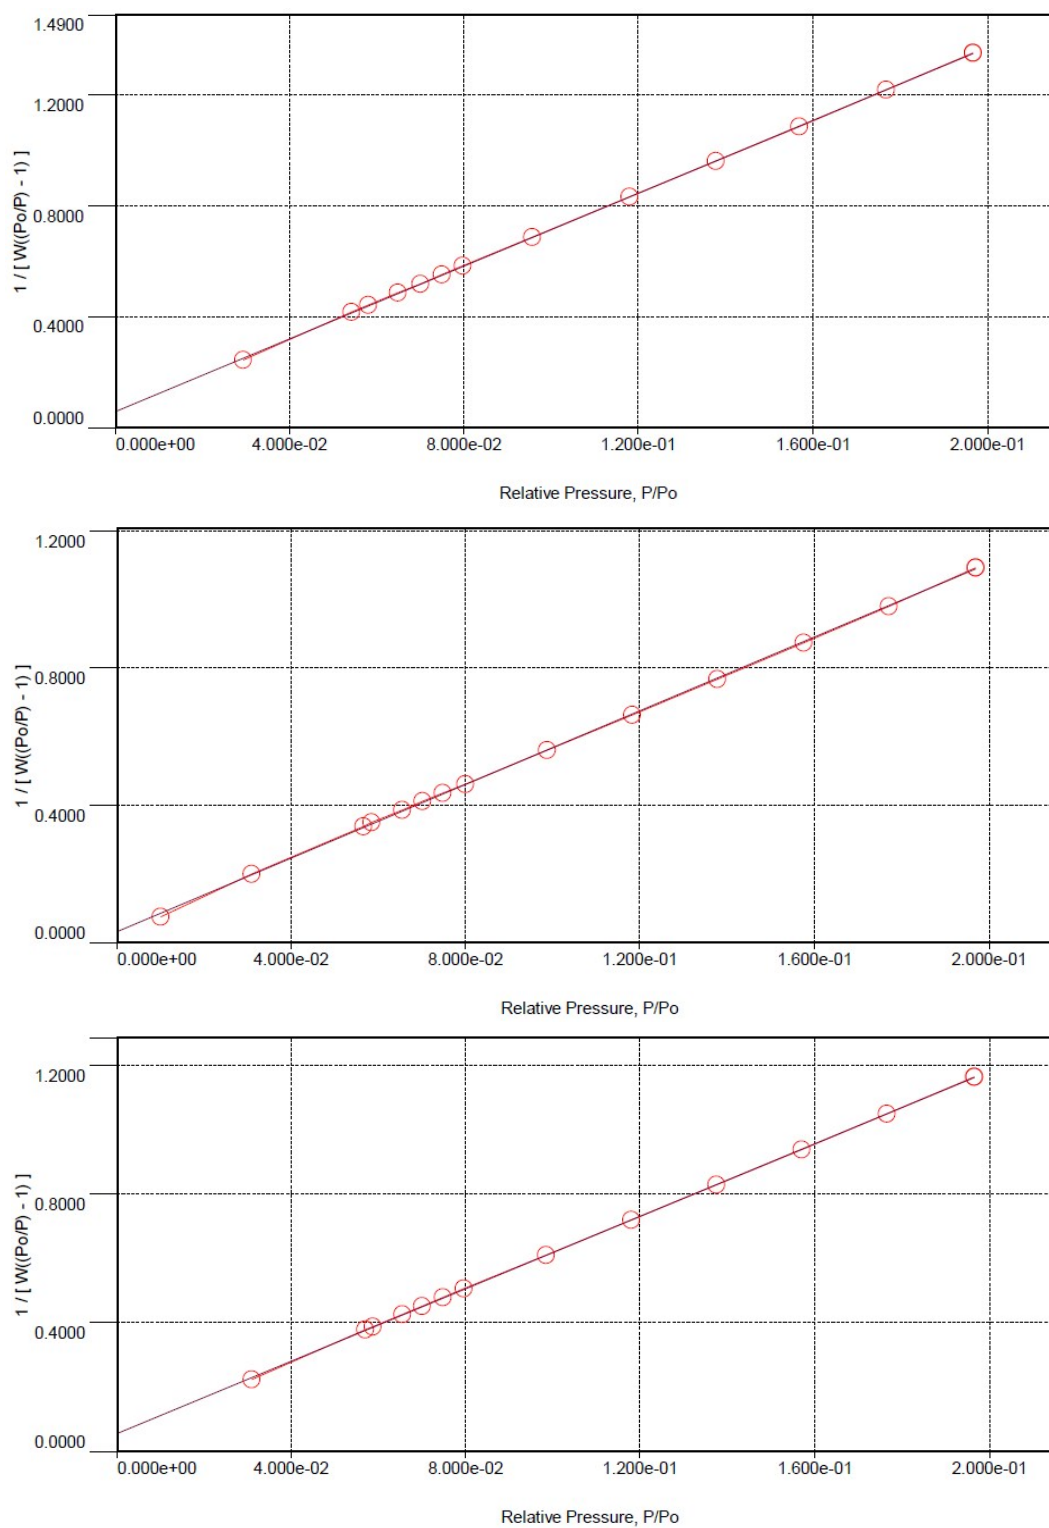

**Fig. S7** BET plots of HPP-1 (top,  $r = 0.999970$ ,  $C = 111.91$ ), HPP-1-EDA (middle,  $r = 0.999910$ ,  $C = 166.16$ ) and HPP-1-HDA (bottom,  $r = 0.999992$ ,  $C = 190.22$ )

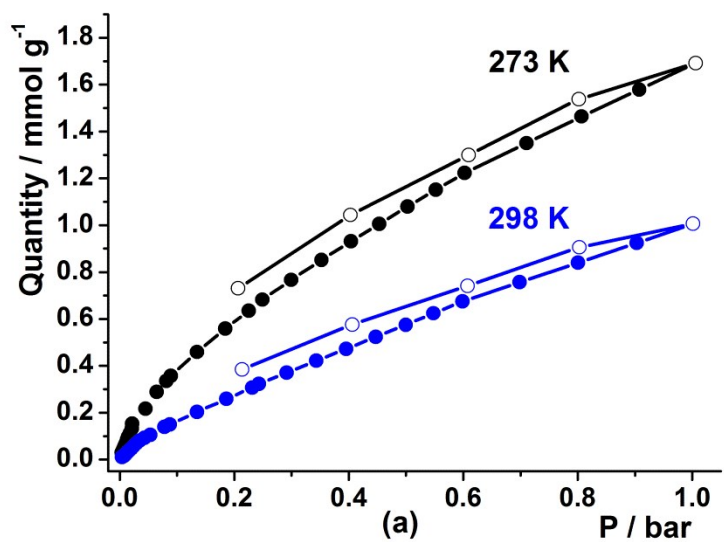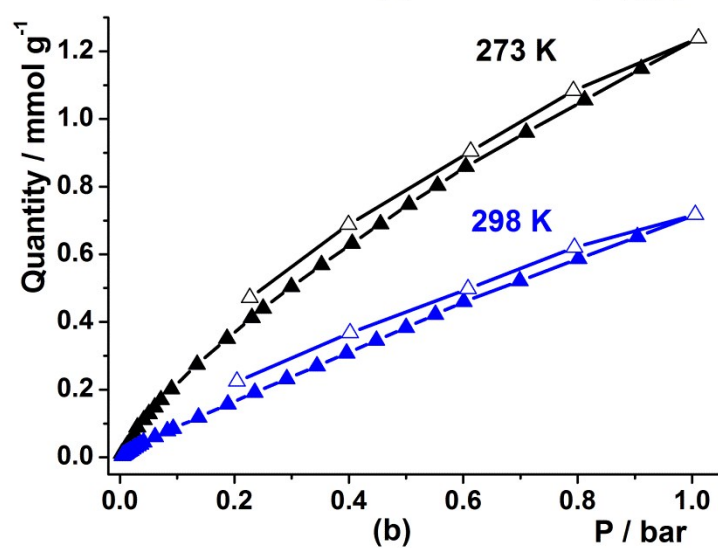

**Fig. S8** CO<sub>2</sub> adsorption (closed symbols) and desorption (open symbols) isotherms of HPP-1-EDA and HPP-1-HDA at 273 K and 298 K

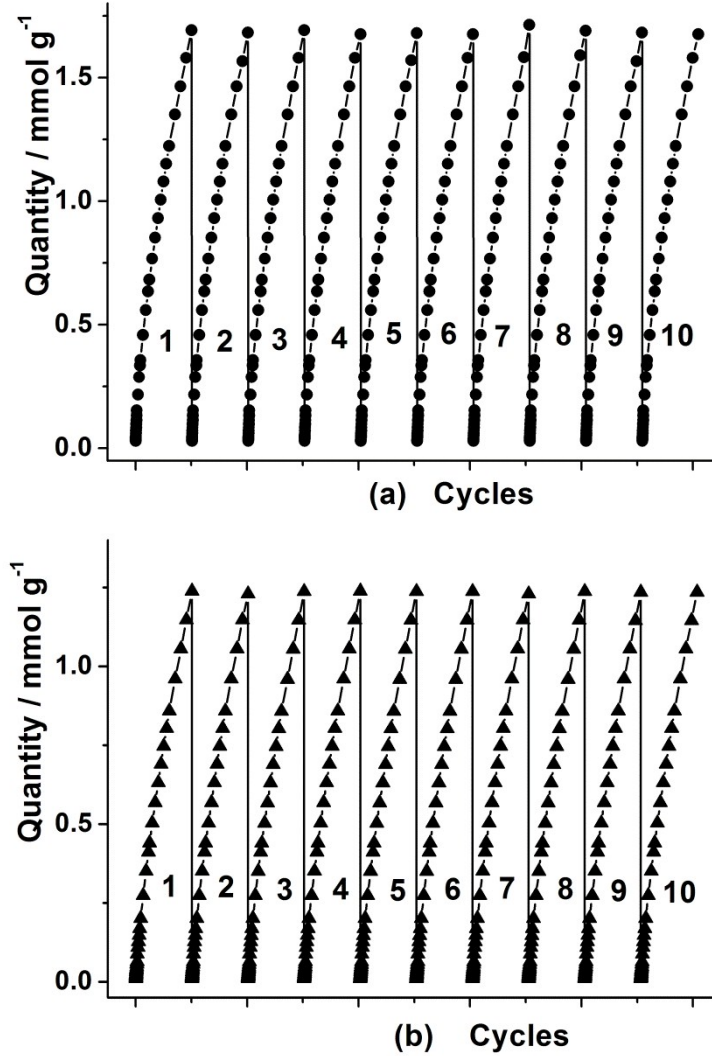

**Fig. S9** Ten cycles of CO<sub>2</sub> uptakes of HPP-1-EDA (a) and HPP-1-HDA (b) at 273 K.

After saturation, the sample was regenerated with a temperature swing to 80°C and then under vacuum.

### Henry's Law selectivity of CO<sub>2</sub> over N<sub>2</sub> for HPP-1, HPP-1-EDA and HPP-1-HDA at 298 K

A nice fitting of CO<sub>2</sub> and N<sub>2</sub> isotherms has been calculated based on Toth isotherm model.<sup>[1,2]</sup>

$$q = q_{sat} \frac{b^{1/t} P}{(1 + b^t)^{1/t}}$$

where  $q$  is the uptake in mmol g<sup>-1</sup>,  $q_{sat}$  is the saturation uptake in mmol g<sup>-1</sup>,  $P$  is the pressure in torr,  $t$  and  $b$  are parameters which are specific for adsorbent pairs.



The Henry law constant  $K$ , quantifies the extent of the adsorption of a given adsorbate by a solid. The magnitude of  $K$  depends on the properties of both adsorbate and solid. For the Toth isotherm, the Henry law constant is defined by the following equation:

$$K = \lim_{P \rightarrow 0} \left( \frac{dq}{dP} \right) = b^{1/t} q_{sat}$$

Finally, the Henry's Law selectivity  $S_{\alpha/\beta}$  of gas  $\alpha$  over  $\beta$  is given by the following equation:

$$S_{\alpha/\beta} = \frac{K_{\alpha}}{K_{\beta}}$$

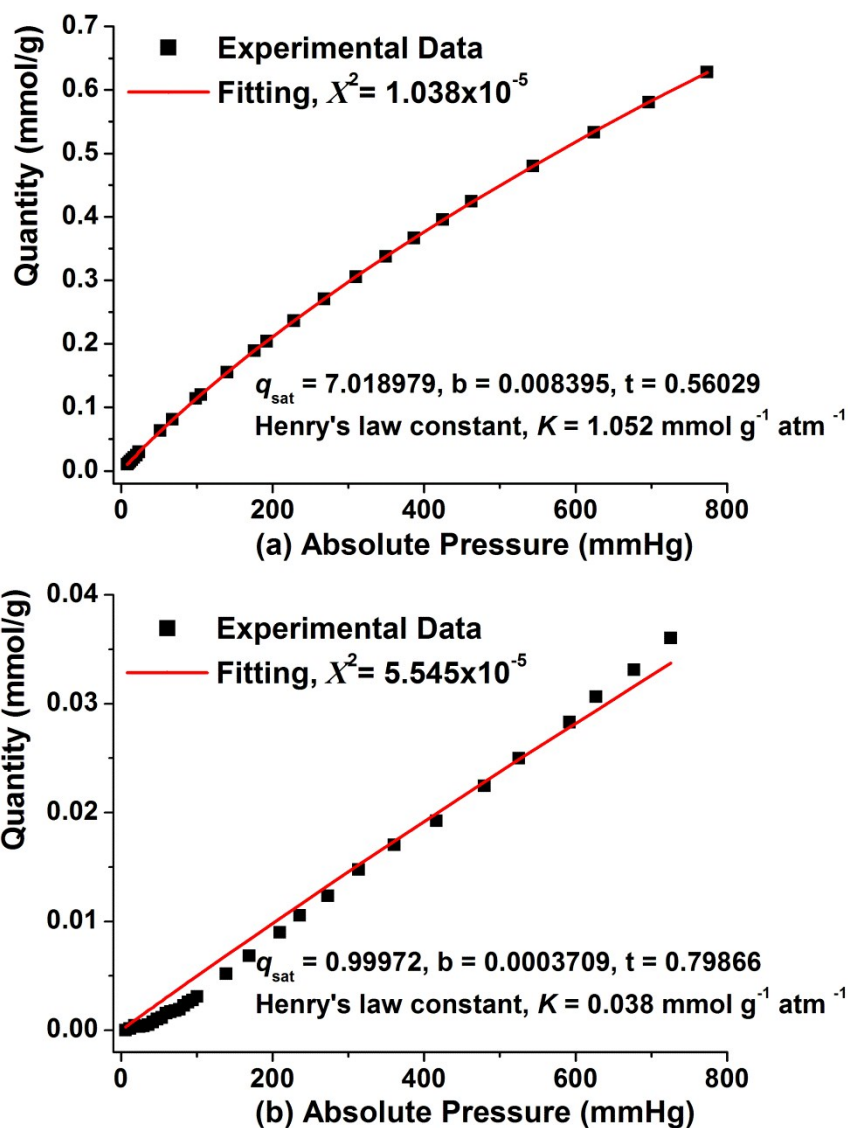

**Fig. S10** Toth model fitting of CO<sub>2</sub> (a) and N<sub>2</sub> (b) adsorption isotherms of HPP-1 at

298 K

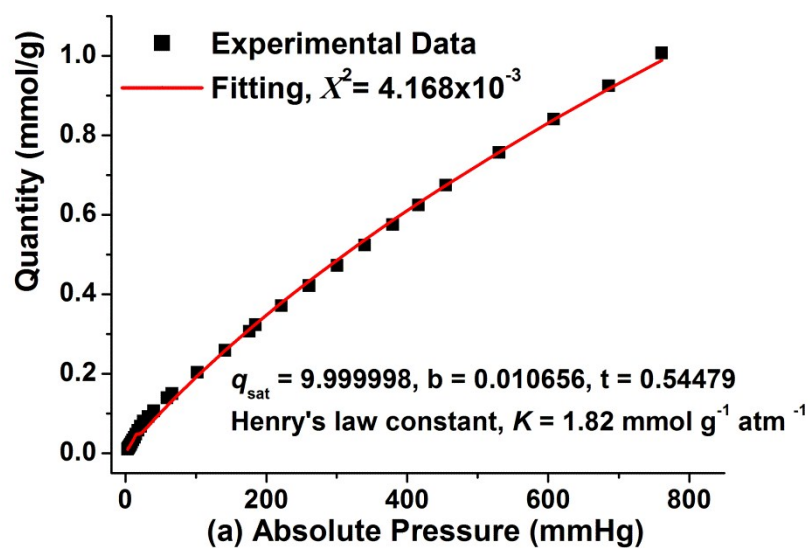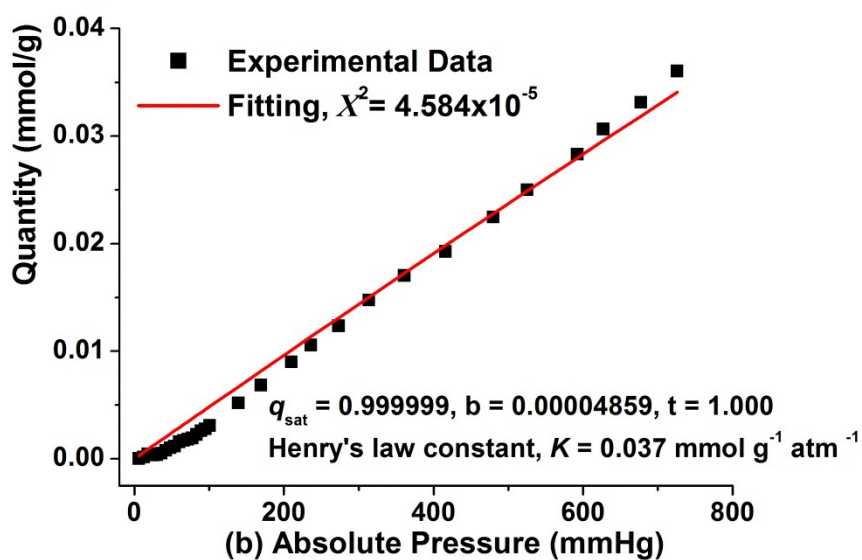

Fig. S11 Toth model fitting of CO<sub>2</sub> (a) and N<sub>2</sub> (b) adsorption isotherms of HPP-1-

EDA at 298 K

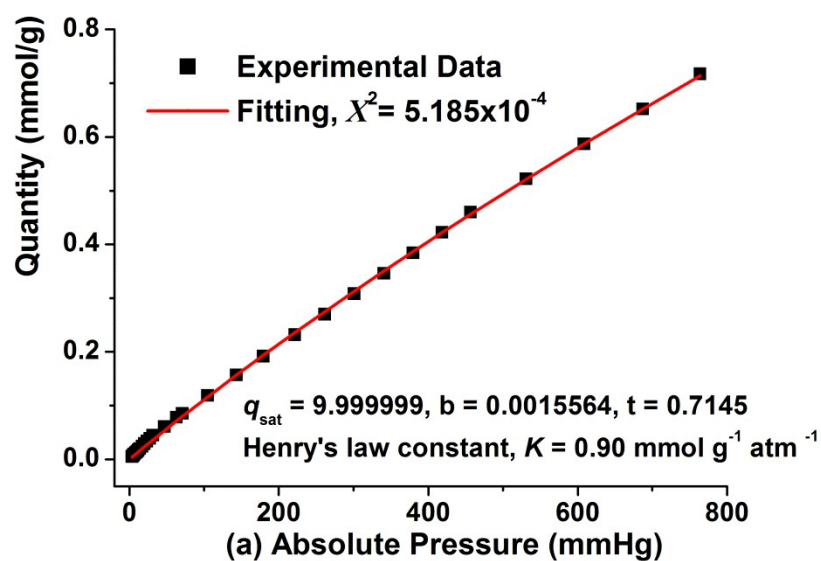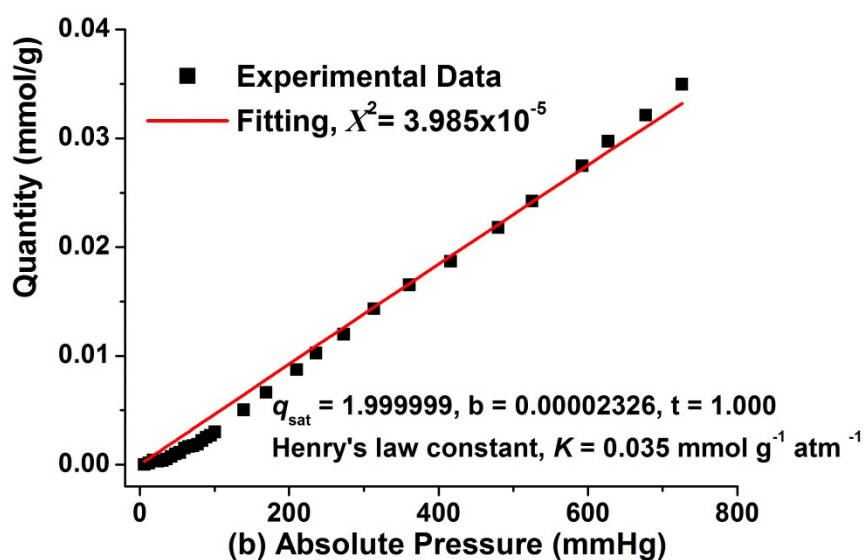

Fig. S12 Toth model fitting of CO<sub>2</sub> (a) and N<sub>2</sub> (b) adsorption isotherms of HPP-1-HDA at 298 K

## References

- [1] E. Neofotistou, C. D. Malliakas, P. N. Trikalitis, *Chem. Eur. J.*, 2009, **15**, 4523–4527.
- [2] B. Wang, A. P. Côté, H. Furukawa, M. O’Keeffe, O. M. Yaghi, *Nature*, 2008, **453**, 207–211.
